# Supplementary material for: A mimotope peptide-based dual-signal readout competitive enzyme-linked immunoassay for non-toxic detection of zearalenone
Source: Royal Society of Chemistry journal article supplement (doi:10.1039/c9tb01167f), 2019-01-01
Supplement: c9tb01167f1.pdf [file c9tb01167f1.pdf]

**1 A mimotope peptide-based dual-signal readout competitive enzyme-**  
**2 linked immunoassay for non-toxic detection of Zearalenone**

3 Yanjie Chen<sup>a</sup>, Shupeí Zhang<sup>b</sup>, Zhensheng Hong<sup>a</sup>, Yanyu Lin<sup>c</sup>, Hong Dai<sup>a,b\*</sup>

4 <sup>a</sup> College of Chemistry and Materials, Fujian Normal University, Fuzhou 350108, P.

5 R. China

6 <sup>b</sup> Fujian Provincial Maternity and Children`s Hospital, Fuzhou, Fujian, 350108, China

7 <sup>c</sup> Ministry of Education Key Laboratory of Analysis and Detection for Food Safety, and

8 Department of Chemistry, Fuzhou University, Fuzhou 350002, P. R. China

9

---

Corresponding author: Fax: (+86)-591-22866135; E-mail: [dhong@fjnu.edu.cn](mailto:dhong@fjnu.edu.cn) (H. Dai);

1 **Table S1**

2 Recovery measurements of ZEN in soy sauce (n=3)

| Smple | Found<br>(ng/mL) | Add<br>(ng/mL) | Total found<br>(ng/mL) | Recovery<br>(%) |
|-------|------------------|----------------|------------------------|-----------------|
| 1     | 0.0549           | blank          | 0.0549                 |                 |
| 2     | 0.0549           | 0.1            | 0.1542                 | 99.3            |
| 3     | 0.0549           | 0.01           | 0.0654                 | 104.7           |
| 4     | 0.0549           | 0.001          | 0.05595                | 105.1           |

3

4

## 1 **Synthesis of Au nanocones**

2 In order to harvest pure Au nanocones (Au NCs), we took Li's work as reference with  
3 some minor modifications.<sup>24</sup> In particular, 250  $\mu\text{L}$  of 0.01M  $\text{HAuCl}_4$  solution and 250  
4  $\mu\text{L}$  of 0.01M  $\text{H}_2\text{PtCl}_6$  solution were mixed together at room temperature and added to  
5 20 mL 0.1 M CTAB solution under stirring. Next, 2 mL new prepared  $\text{NaBH}_4$  ice-cold  
6 solution (0.01M) was injected into the mixture slowly and shook for 5 min followed by  
7 keeping in an oven at 35  $^\circ\text{C}$  for 5 h to acquire the seed solution. Besides, a mixture  
8 composited of 3.5 mL  $\text{HAuCl}_4$  (0.01M), 150  $\mu\text{L}$   $\text{H}_2\text{PtCl}_6$  (0.01M), 800  $\mu\text{L}$   $\text{AgNO}_3$   
9 (0.01M) and 1600  $\mu\text{L}$   $\text{HCl}$  (1M ) was added into 80mL of 0.1 M CTAB solution and  
10 vigorously stirred for 5 min to get uniform solution. After that, 640  $\mu\text{L}$  of 0.1 M ascorbic  
11 acid (AA) solution was injected into the mixed solution under stirring to have a reduce  
12 reaction. When the mixed solution changed to colorless, the seed solution prepared  
13 above was added immediately and vigorously stirred for 5 min. After that, the mixture  
14 was put into oven to have a constant temperature reaction at 35  $^\circ\text{C}$  for 12 hours. The Au  
15 NCs solution was purified just by centrifuging (6000 r/min, 10 min) to remove the solid  
16 from the supernatant. Finally, the prepared Au NCs was functionalized with  $1\text{mg mL}^{-1}$   
17 MEA under volume ratio of 1:3 and stirred for 6 h. The MEA could connected to Au  
18 NCs via formation of Au-S bond.

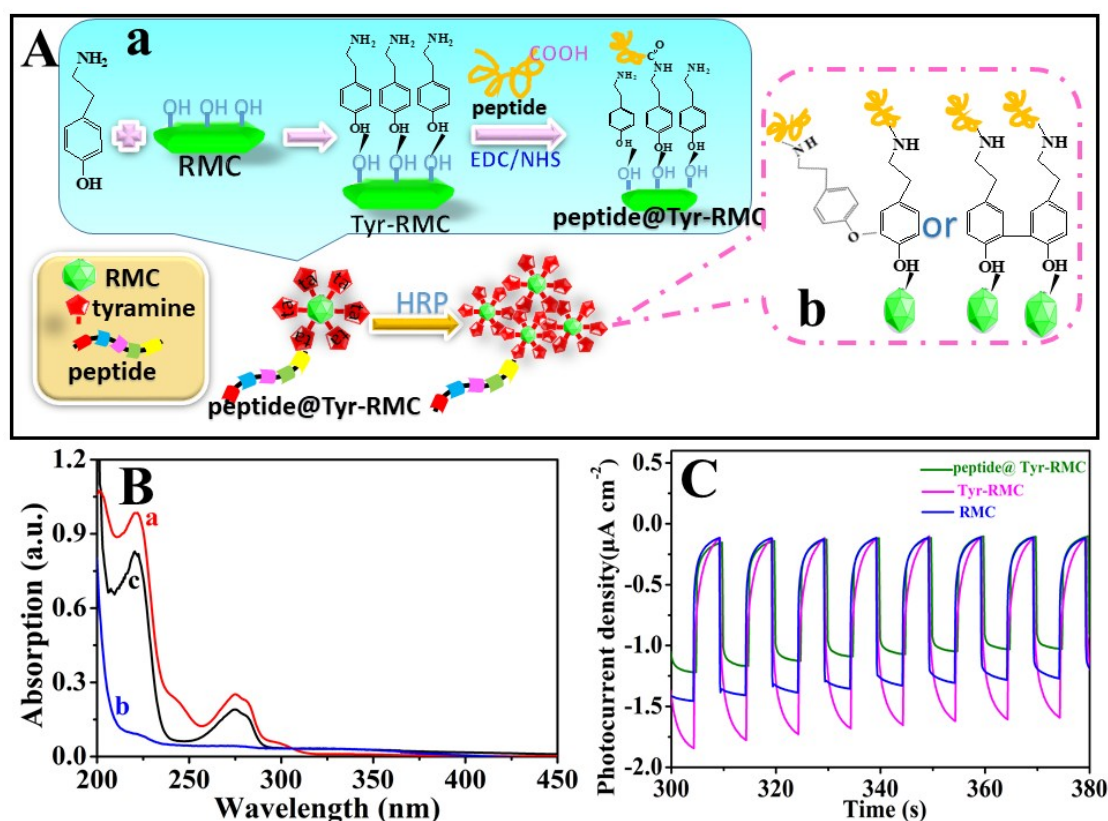

1  
2 **Figure S1** (A) The illustration of the construction process of peptide@Tyr-RMC. (B)  
3 Absorbance spectra of tyramine (a), RMC (b), ta-RMC (c). (C) Photocurrent density  
4 measurement on different modified electrode RMC (blue line), Tyr-RMC (magenta  
5 line) and peptide@Tyr-RMC (green line) in PBS (pH 7.0) with applied potential of  
6 0.2V.  
7 Fig. S1A (a) described the construction process of peptide@Tyr-RMC. The oxygen  
8 vacancies in RMC trended to capture H<sub>2</sub>O molecules and H<sub>2</sub>O molecules dissociated  
9 into OH and H fragments, thereby caused formation of Ti-OH on RMC surface. In this  
10 case, hydroxyl in tyramine was prior to connect onto RMC surface via hydrogen bond  
11 between hydroxyl and Ti-OH.<sup>32</sup> After introduction of ZMP, the mimotope peptide  
12 connected to Tyr-RMC via classic EDC/NHS coupling reaction between amine (-NH<sub>2</sub>)  
13 groups on tyramine and carboxyl (-COOH) group of peptide.<sup>33,34</sup> As for Fig. S1A (b)

1 described the signal amplification mechanism of peptide@Tyr-RMC composite.  
2 Subjecting to catalytic of HRP, ta-RMC composite depose at the site of enzyme reaction  
3 through either a C–C linkage between the other-carbons of the aromatic ring or a C–O  
4 linkage between the ortho-carbon and the phenolic oxygen<sup>36-38</sup>. To verify the successful  
5 preparation of Tyr-RMC composite optical properties of obtained pure and doped  
6 systems were recorded by ultraviolet-visible absorption spectra (UV-vis) in Fig. S1B.  
7 As exhibited in Fig. S1B, the unmodified RMC (b) did not show apparent UV light  
8 absorption in wavelength range from 200 nm to 450 nm because of its wide band gap<sup>S1</sup>.  
9 While pure tyramine (a) indicated an evident absorption peak at 225 nm and 275 nm,  
10 which was correspond to previous reports<sup>38</sup>. After modifying RMC with tyramine, the  
11 Tyr-RMC composite (c) showed the characteristic absorption peaks of both 225 nm and  
12 275 nm, indicating that tyramine have successfully coated on the RMC surface. To  
13 further verified that the peptide@Tyr-RMC composite (green line) was successfully  
14 synthesized, the photocurrent response on different composite modified electrode were  
15 evaluated in Fig. S1C. Comparing with unmodified RMC (blue line), the Tyr-RMC  
16 composite (magenta line) presented increasing photocurrent response owing to self-  
17 oxidization of tyramine suppressed the recombination of electron-hole pairs in RMC.  
18 Whereas as peptide@Tyr-RMC composite anchored onto the electrode, the  
19 photocurrent response decreased for insulated protein complex inhibited the electron  
20 transfer. Based on these discussions we can infer that the peptide@Tyr-RMC probe has  
21 successfully fabricated.

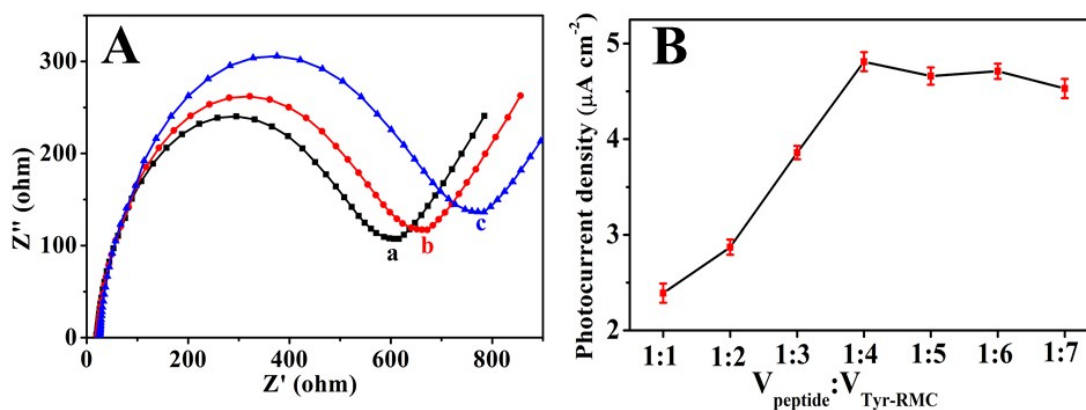

**Figure S2** (A) EIS and measurement on different modified electrode (a) GCE/CNHs/  
 Au NCs/poly (Gly) /Ab, (b) GCE/CNH/Au NCs/poly (Gly)/Ab/peptide, (c)  
 GCE/CNH/Au NCs/ poly (Gly)/Ab/peptide@Tyr-RMC (B) Photocurrent response on  
 GCE/CNH/Au NCs/poly (Gly)/Ab/ peptide@Tyr-RMC under different volume ratio  
 between peptide and Tyr-RMC

As illustrated in Fig.S2A, the electrochemical impedance on GCE/CNH/Au NCs/poly  
 (Gly)/Ab/mimotope peptide (curve b) was evidently larger than that on GCE/CNH/Au  
 NCs/poly (Gly)/Ab (curve a), implying that an immune recognition reaction took place  
 between mimotope peptide and antibody. After peptide@Tyr-RMC immobilized on  
 GCE/CNH/Au NCs/poly (Gly)/Ab electrode, electrochemical impedance on  
 GCE/CNH/Au NCs/poly (Gly)/Ab/peptide@Tyr-RMC (curve c) was remarkably  
 increased comparing to curve a and b. Therefore, we drew a conclusion that the  
 peptide@Tyr-RMC could still recognize the antibody on GCE/CNH/Au NCs/poly  
 (Gly)/Ab electrode even though Tyr-RMC attached, which also indicated that the Tyr-  
 RMC as a report unit played an important role in signal amplification. To specially  
 explore the interaction between antibody and peptide@Tyr-RMC, Fig. S2B presented  
 the photocurrent response on GCE/CNH/Au NCs/ poly (Gly)/Ab electrode after

1 incubating with peptide@Tyr-RMC probe with different volume ratio between  
2 mimotope peptide and Tyr-RMC. The photocurrent density increased hugely with  
3 increased ratio of Tyr-RMC in the range from 1:1 to 1:4 and the maximum photocurrent  
4 density value appeared at ratio of 1:4, whereas the photocurrent trended to level off and  
5 decline after 1:4. For one thing, the adsorption between Tyr-RMC and mimotope  
6 peptide was saturated. For another, RMC aggregated at excess volume ratio and part of  
7 mimotope peptide was coated by Tyr-RMC, which inhibited the interaction with  
8 antibody on electrode interface. Therefore, 1:4 was finally selected as the optimal  
9 volume ratio between mimotope peptide and Tyr-RMC.

10

11

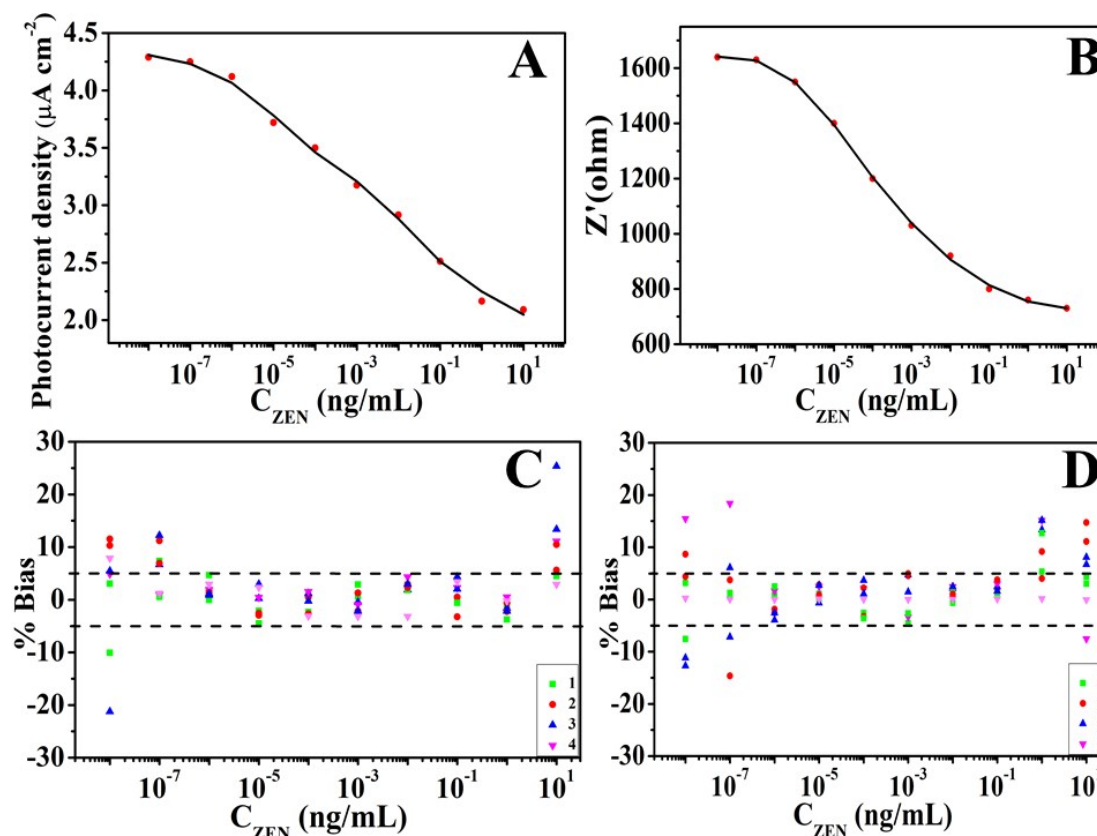

1  
2 **Figure S3** LBA curves of photocurrent response (A) and electrochemical impedance  
3 measurement (B) for different concentration of ZEN after treating with  $0.5 \text{ mg mL}^{-1}$   
4 HRP. %Bias plots for photocurrent response (C) and electrochemical impedance  
5 measurement (D) by preparing four independent sets of mock standards to have two  
6 analysts prepare two sets each  
7 Considering that this is a competitive assay, the instrument response was inversely  
8 related to the analyte concentration in ligand binding assay (LBA).<sup>35</sup> While the non-  
9 linear nature of an LBA curve limits the concentration response correlation at the upper  
10 and lower ends of the curve, resulting in plateaus and therefore an S-shaped curve, as  
11 presented in Fig.S3 A and B. In this case, the concentration-response relationship of  
12 these calibrator standards established the calibration curve of the assay. The % bias  
13 plots was practical approach to establish the quantitation range and to judge the  
14 usefulness of auxiliary points. As illustrated in Fig. S3 C and D, four independent sets  
15 of mock standards was prepared to have two analysts prepare two sets each and each



1 set of mock standards was added to an assay plate in duplicate wells. The %bias used  
2 in the example was as follows:

3 
$$\%Bias = \frac{\text{Determined Concentration} - \text{Normal concentration}}{\text{Normal concentration}} \times 100\%$$

4 According to guidance, bias of up to 25% at the LLOQ level was acceptable. While  
5 to pursue a tighter bias acceptance standards with bias less than 5% seem to make a  
6 suitable quantification range in the example provided here. The % bias plots in Fig.  
7 S2C and D indicated that the quantification range (LLOQ to ULOQ) for  
8 photocurrent and electrochemical impedance measurement should be  $10^{-6}$  to 1  
9 ng/mL and  $10^{-6}$  to  $10^{-1}$  ng/mL respectively. Based on this, the S-shaped curves in  
10 Fig. S2A and B were fitted into standard curves in effective liner range as presented  
11 in Fig.4B and D. The linear regression equation of two curves were expressed as  
12 Photocurrent density ( $\mu\text{A cm}^{-2}$ ) =  $-0.318 \log C_{ZEN} (\text{ng/mL}) + 1.99$  ( $R^2 = 0.9987$ )  
13 and  $Z'$  (ohm) =  $-152.93 \log C_{ZEN} (\text{ng/mL}) + 620.30$  ( $R^2 = 0.9911$ ) respectively.  
14 And loss of linearity indicated that the assay has reached its limits of the detection,  
15 thus, the detection limit for the designed biosensor was  $10^{-6}$  ng/mL.

16

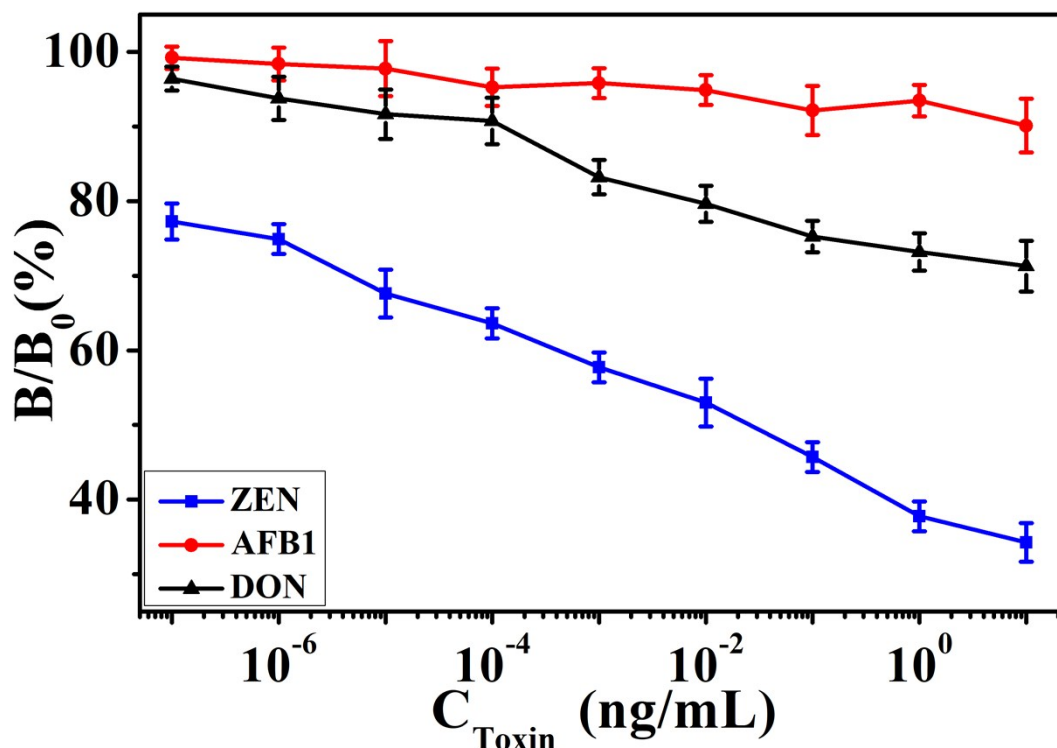

1

2 **Figure S 4** The competitive inhibition curves of competitive ELISA with ZEN, AFB1  
3 and DON from 10<sup>-7</sup> ng/mL to 10 ng/mL.

4 To further test the specificity of designed immunoassay, the competitive inhibition curves  
5 of ZEN, AFB1 and DON were established in Fig. S4. The B<sub>0</sub> was the binding signal  
6 when competitive antigen concentration was 0 ng/mL and B was the binding signal  
7 when the competitive antigen at other concentrations. The half maximal (50%)  
8 inhibitory concentrations (IC<sub>50</sub>) represented the concentration of an inhibitor with 50%  
9 inhibition ratio (B/B<sub>0</sub>) of antibody. In common, a lower IC<sub>50</sub> implied a better specified  
10 ability of antibody. The half maximal (50%) inhibitory concentrations (IC<sub>50</sub>) of ZEN  
11 was calculated to be 0.0144 ng/mL. And IC<sub>50</sub> of AFB1 and DON were both greater  
12 than the highest concentration in standard curve (1 ng/mL). Furthermore, IC<sub>50</sub> of DON  
13 seems to be lower than of AFB1, implying the ZEN antibody demonstrated a relative  
14 lower specificity ability to DON compared to AFB1<sup>40</sup>. This conclusion can well explain the

1 phenomenon in Fig. 5A and C.

2

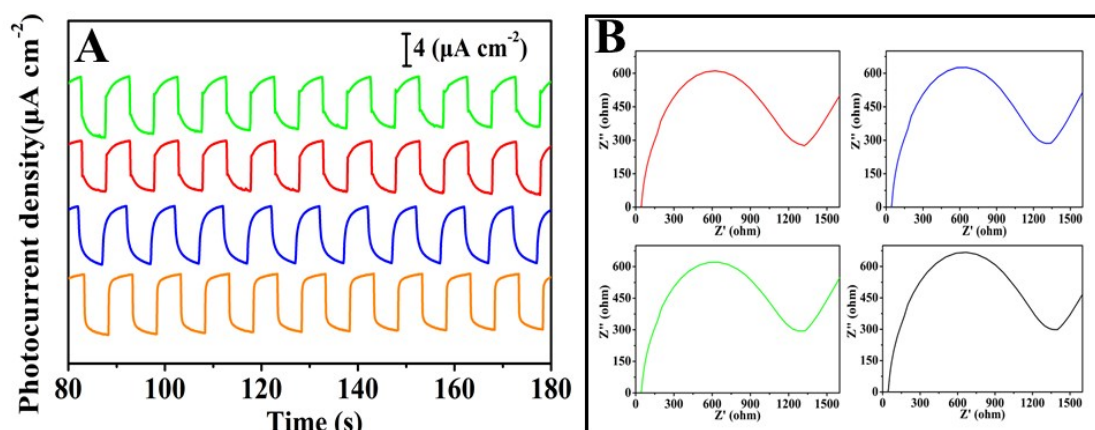

1  
2 **Figure S5** The reproducibility of PEC biosensor was evaluated by determining  
3 photocurrent response in four electrodes (GCE/CNH/Au NCs/poly (Gly)/Ab/  
4 peptide@ta-RMC /HRP- $\text{H}_2\text{O}_2$ ) under chopped light illumination with applied potential  
5 of 0.2V in PBS (pH 7.0) (A). And EIS in four electrodes (GCE/CNH/Au NCs/poly  
6 (Gly)/Ab/peptide@ta-RMC /HRP- $\text{H}_2\text{O}_2$ ) in mixed solution of 5.0 mM  $\text{K}_3$   
7  $[\text{Fe}(\text{CN})_6]/\text{K}_4[\text{Fe}(\text{CN})_6]$  (1:1) contained 0.5 M KCl with applied potential of 0.199V  
8 (B).

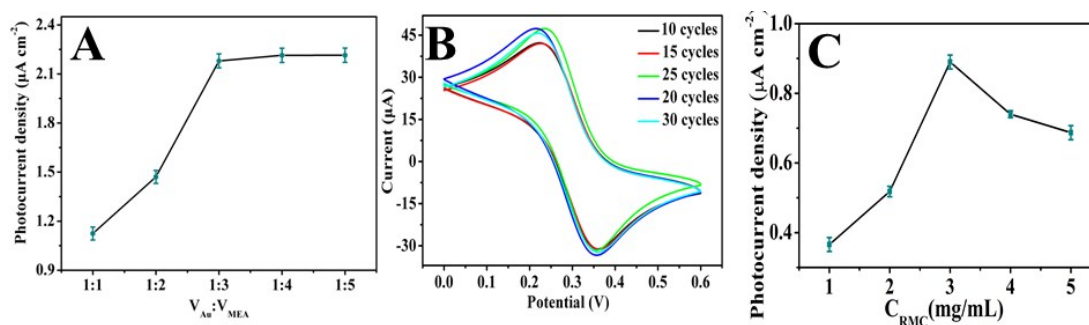

**Figure S6** effect of (A) volume ratio between Au CNs and MEA, (B) different electrochemical polymerization cycle of Glycine on electrode interface, (C) different concentration of RMC, (D) volume ratio between peptide and Tyr-RMC.

The influence of volume ratio between Au NCs and MEA was analyzed in Fig. S6A, the Au NCs was compound with MEA under the volume ratio of 1:1, 1:2, 1:3, 1:4 and 1:5 respectively, with increasing volume ratio, the photocurrent enhanced rapidly and level off at 1:3. After that, more MEA absorbed on the surface of Au NCs via Au-S bond, the steric hindrance generated by MEA was the dominant factor and no obvious change of photocurrent exhibit. Thus 1:3 was finally selected as the optional volume ratio between Au NCs and MEA. Fig. 6B depicted the influence of the cyclic voltammetry to get optimal cycles of Glycine. The cycles were measured for 10, 15, 20, 25 and 30 respectively, and highest photocurrent response was emerged at 25 cycles, suggesting that the modified electrode have good electrochemical conductivity. Whereas, a slight reduction of peak photocurrent appeared at 30 cycles, thus, this phenomenon proved 25 cycles was the most compatible cycles. As for Fig. S6C, it can be found that the photocurrent increased rapidly with the concentration of RMC, while as RMC concentration exceeds 3mg/mL, the photocurrent showed downward trend

1 gradually for excess RMC on electrode suppressed. Thus, 3mg/mL RMC was selected

2 as the optimal concentration for immunoassay.

3

4

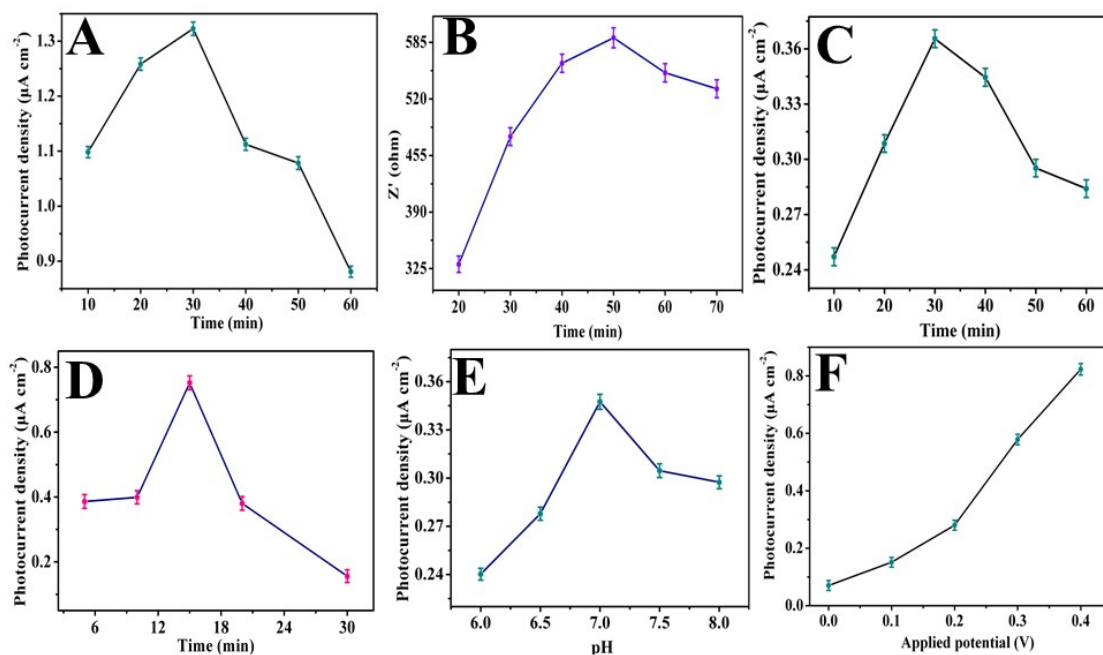

**Figure S7** The effect of different (A) the absorption time between RMC and tyramine, (B) ZEN-MAb incubate time, (C) competitive reaction time between target free ZEN and peptide@Tyr-RMC conjugate, (D) HRP catalysis time (2 Mm  $\text{H}_2\text{O}_2$  solution). (E) pH and (F) applied potential during the PEC measurement.

Fig. S7A evaluated the optimal absorption time between RMC and tyramine, owing to the self-oxidation of tyramine, the electron-hole recombination in RMC was suppressed which promote electron transfer efficiently. The photocurrent decreased when absorption time exceed 30 min due to the increased amount of tyramine hindered the transfer of electrons on the electrode interface. Therefore, the optimal response was obtained at 30 min. As Fig. S7B exhibited, the impedance increased with increasing ZEN-MAb incubation time and reached top at 50 min. The impedance decreased gradually when the incubation time was prolonged, which can be ascribed to the approximately saturated reaction between ZEN-MAb and poly(Gly). And the photocurrent output was mainly dependent capture amount of peptide@Tyr-RMC

1 conjugate on electrode, thus, the competitive reaction time between target free ZEN  
2 and peptide@Tyr-RMC conjugate was explored in Fig. S7C, the photocurrent response  
3 enhanced sharply from 10 to 30 min, and decreased when the time exceed 30 min for  
4 more insulated protein complex hindered the electron migration seriously. Fig. 7D  
5 presented the effect of HRP catalysis time on the photocurrent response after the  
6 electrode interface has been captured by peptide@Tyr-RMC conjugate in 2 mM H<sub>2</sub>O<sub>2</sub>  
7 solution. The photocurrent response increased gradually from 6 to 15 min and decreased  
8 when further prolonging the catalysis time. There are mainly two factors: (i)  
9 aggregation of the Tyr-RMC conjugate made more electron-hole recombination (ii)  
10 with the increase of film thickness, the internal resistances increase, which led to  
11 decrease of photocurrent. The effect of pH variation on the photocurrent response was  
12 investigated in the range of 6-8. As exhibited in Figure S7E, the photocurrent density  
13 elevated rapidly and reached maximum at pH=7.0 and then decreased with increasing  
14 of the pH. Thus, pH 7.0 was selected as the optimum pH in the subsequent  
15 measurements. Besides, Figure S7F investigated the effect of applied potential on the  
16 photoelectrochemical response toward the detection of the ZEN from 0.0-0.4V, with  
17 the increase of positive potential, the photocurrent increased sharply resulting from the  
18 lower electron-transfer energy barrier. However, in order to avoid oxidation of  
19 substrate in high positive potential, 0.2 V was selected as the applied potential during  
20 the determination progress.

21



- 1 S1 Y.M. Lin, Y. L. Su, Y. H. Zhu, Z. Y. Jiang, H.L. Shi, X. Ding, X. D. Zhang, H. Y.
- 2 Zhu, R. Q. Zhang, Computational Materials Science., 2017,131,178.
